# Supplementary material
Source: PubMed Central journal article supplement (PMC8325385)
Supplement: mmc2.pdf [file mmc2.pdf]

Bar Graph of for Mild (Figure 2A) and Moderately-severe group (Figure 2B) when followed up from T0-T8, (14 months) using Friedman Test

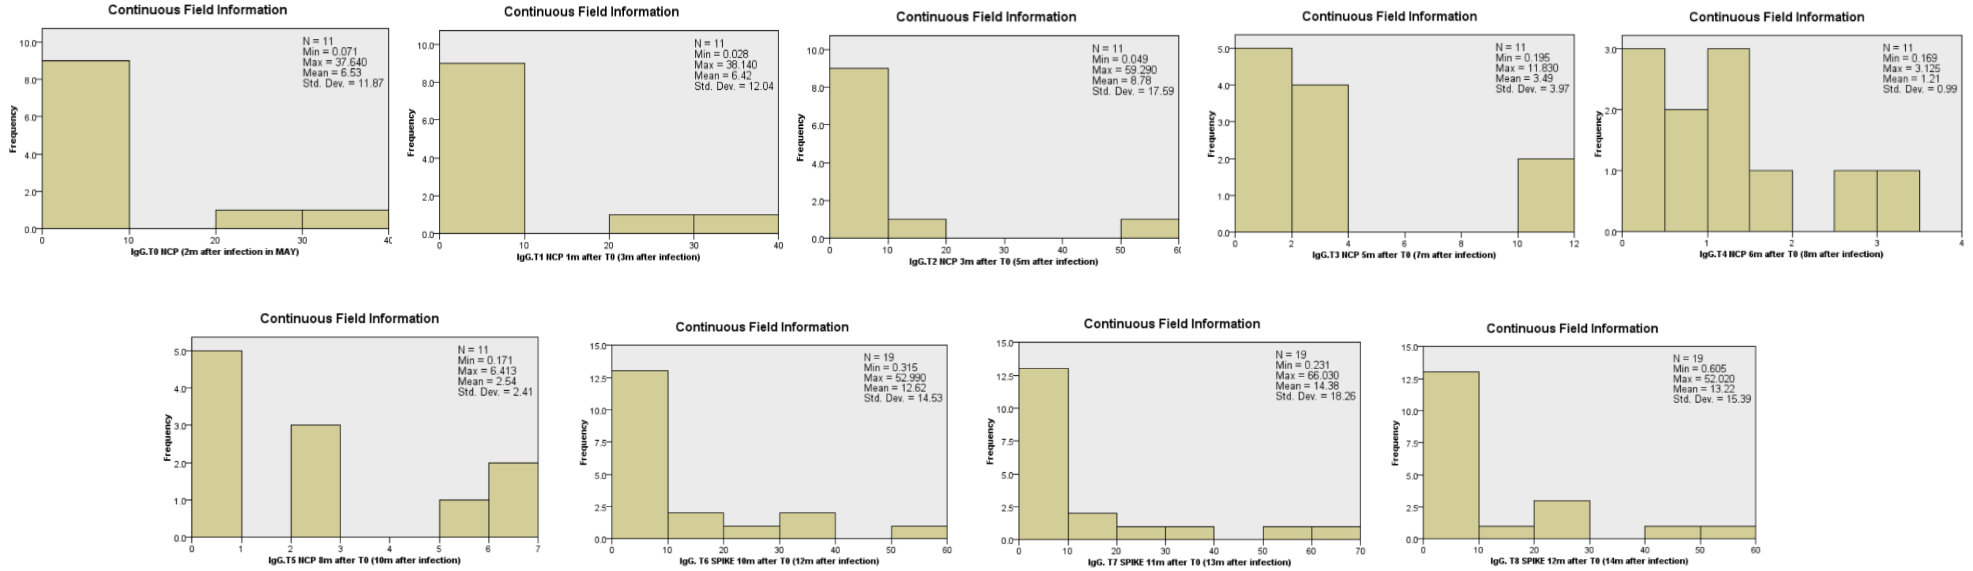

Figure 2A MILD GROUP

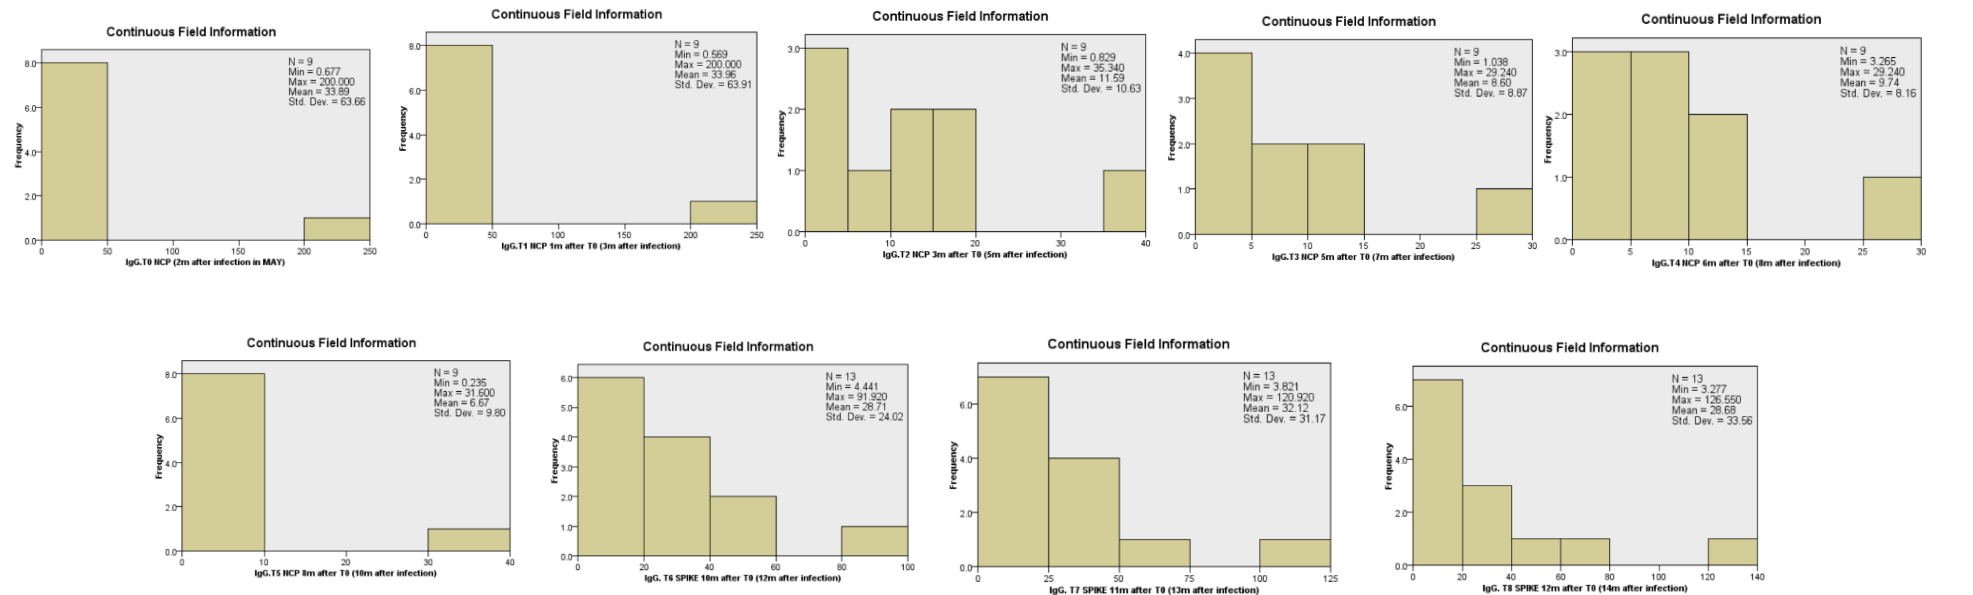

Figure 2B MODERATELY SEVERE GROUP

Figure 2
